# Supplementary material for: In Silico Identification and in Vitro Activity of Novel Natural Inhibitors of Trypanosoma brucei Glyceraldehyde-3-phosphate-dehydrogenase
Source: Molecules. 2015 Sep 3;20(9):16154–69. doi: 10.3390/molecules200916154 (PMC6332274; doi:10.3390/molecules200916154)
Supplement: Supplementary file 1 [file molecules-20-16154-s001.pdf]

## Supplementary Information

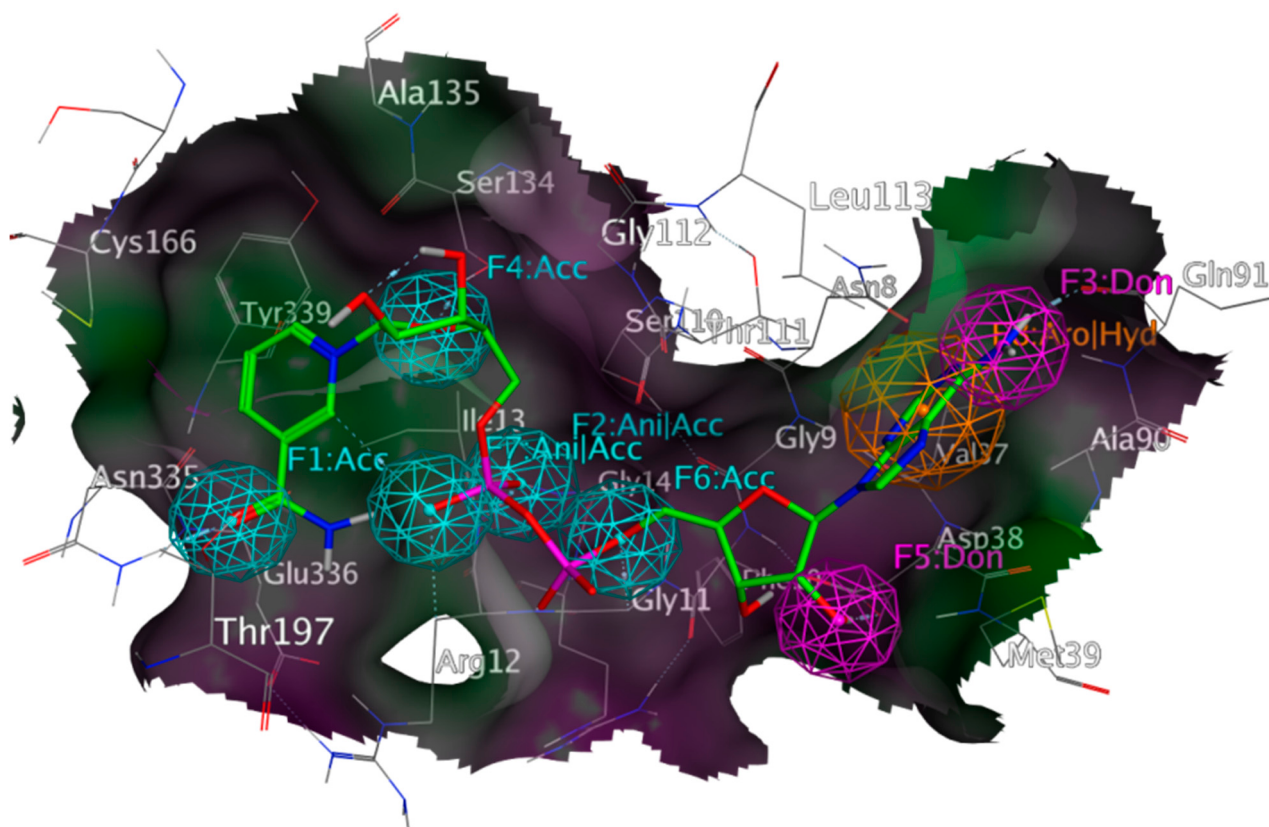

**Figure S1.** Representation of the pharmacophore based on an NAD<sup>+</sup> binding site from *Lmex*GAPDH (PDB-ID 1GYF), co-crystallized NAD<sup>+</sup> shown with green carbon atoms; rendered surface colored according to lipophilicity, green indicating high, purple low lipophilicity; aromatic features in orange, H-bond donor features in purple, H-bond acceptor features in cyan. Interactions employed as features were calculated with MOE (“ligand interactions” algorithm); exclusion spheres are hidden, non-polar hydrogens not shown. Note the absence of solvent molecules as well as the multiple interactions between the protein and negatively charged oxygen atoms from the diphosphate moiety. Compared to the *Tb*GAPDH pharmacophore for NAD<sup>+</sup>, different interactions between the ribose moieties and the active site were also detected by MOE.

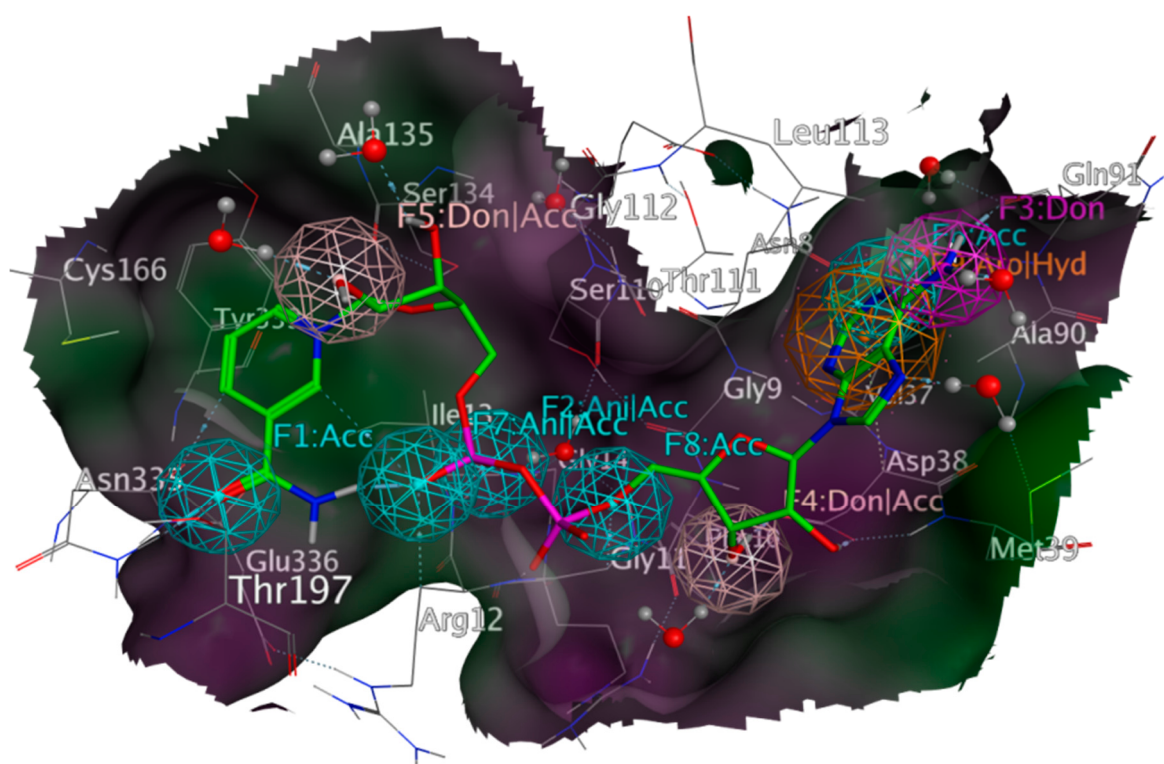

**Figure S2.** Representation of the pharmacophore based on an  $\text{NAD}^+$  binding site from *TcGAPDH* (PDB-ID 3IDS), co-crystallized  $\text{NAD}^+$  shown with green carbon atoms; rendered surface colored according to lipophilicity, green indicating high, purple low lipophilicity; aromatic features in orange, H-bond donor features in purple, H-bond acceptor features in cyan. Interactions employed as features were calculated with MOE (“ligand interactions” algorithm); exclusion spheres are hidden, non-polar hydrogens not shown. Note the presence of co-crystallized solvent molecules mediating interactions with different amino acids of the active site as well as the multiple interactions between the protein and negatively charged oxygen atoms from the diphosphate moiety. Compared to the *TbGAPDH* pharmacophore for  $\text{NAD}^+$ , different interactions between the ribose moieties and the active site were also detected by MOE.

**Figure S3.** Representation of the pharmacophore based on the G-3-P-site from *Tb*GAPDH (PDB-ID 2X0N), co-crystallized NAD<sup>+</sup> shown with green carbon atoms; rendered surface colored according to lipophilicity, green indicating high, purple low lipophilicity; aromatic features in orange, H-bond donor features in purple, H-bond acceptor features in cyan, exclusion spheres are hidden, non-polar hydrogens not shown. Interactions employed as features were determined by the “electrostatic map” algorithm implemented in MOE due to the absence of a co-crystallized ligand; exclusion spheres are hidden.

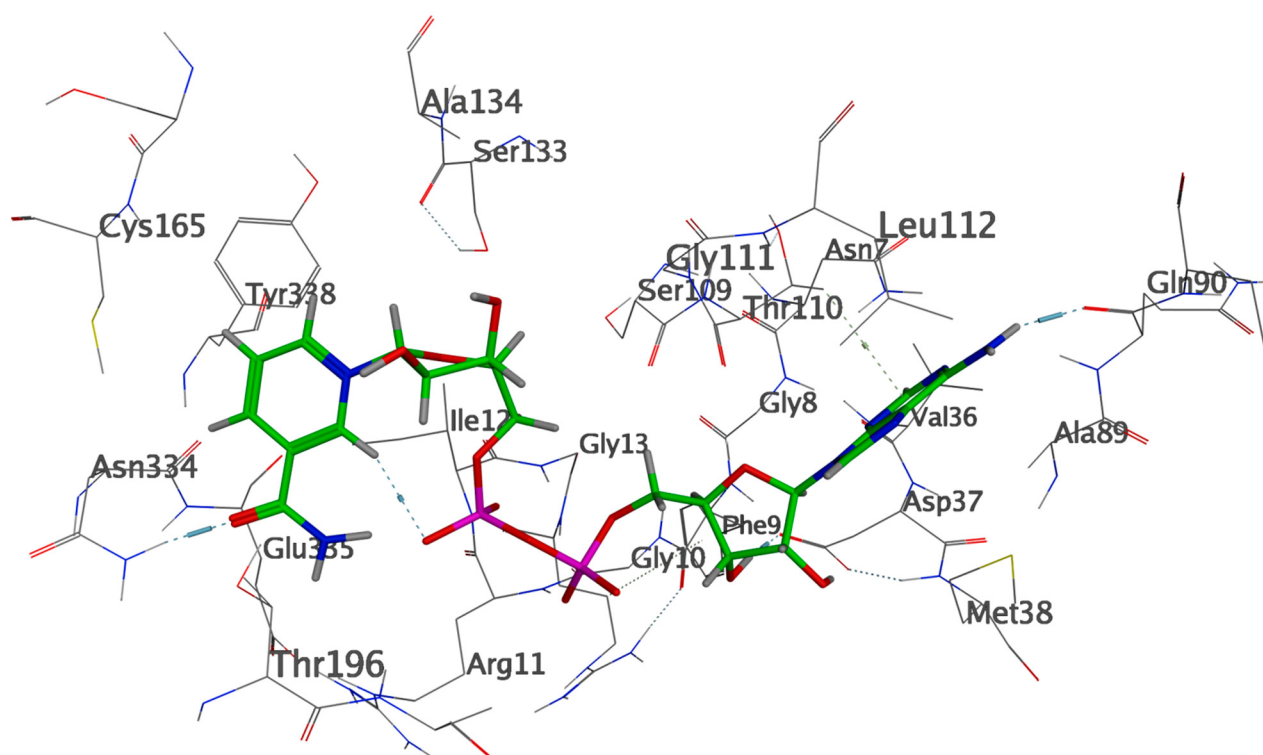

**Figure S4.** Depiction of the NAD<sup>+</sup> site from *Tb*GAPDH (PDB-ID 2X0N). Co-crystallized NAD<sup>+</sup> shown with green carbon atoms, non-polar hydrogens not shown.

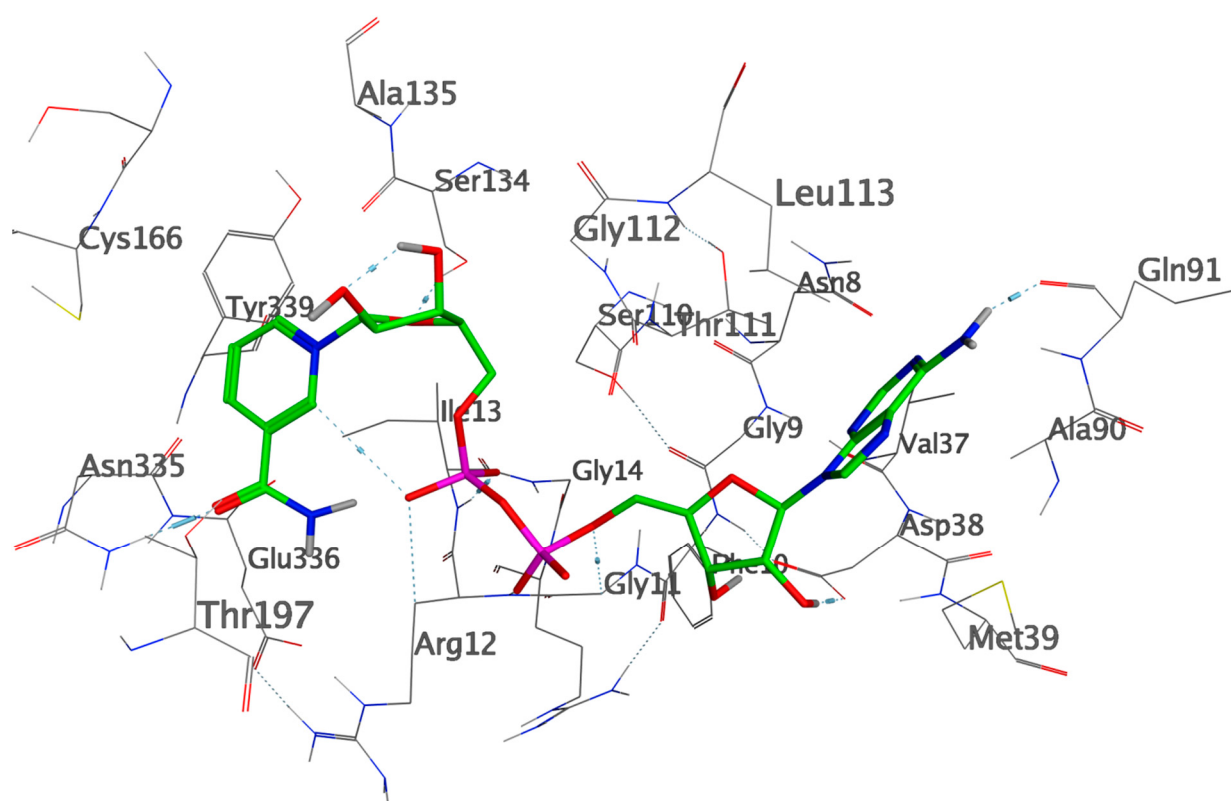

**Figure S5.** Depiction of the NAD<sup>+</sup> site from *Lmex*GAPDH (PDB-ID 1GYF). Co-crystallized NAD<sup>+</sup> shown with green carbon atoms, non-polar hydrogens not shown.

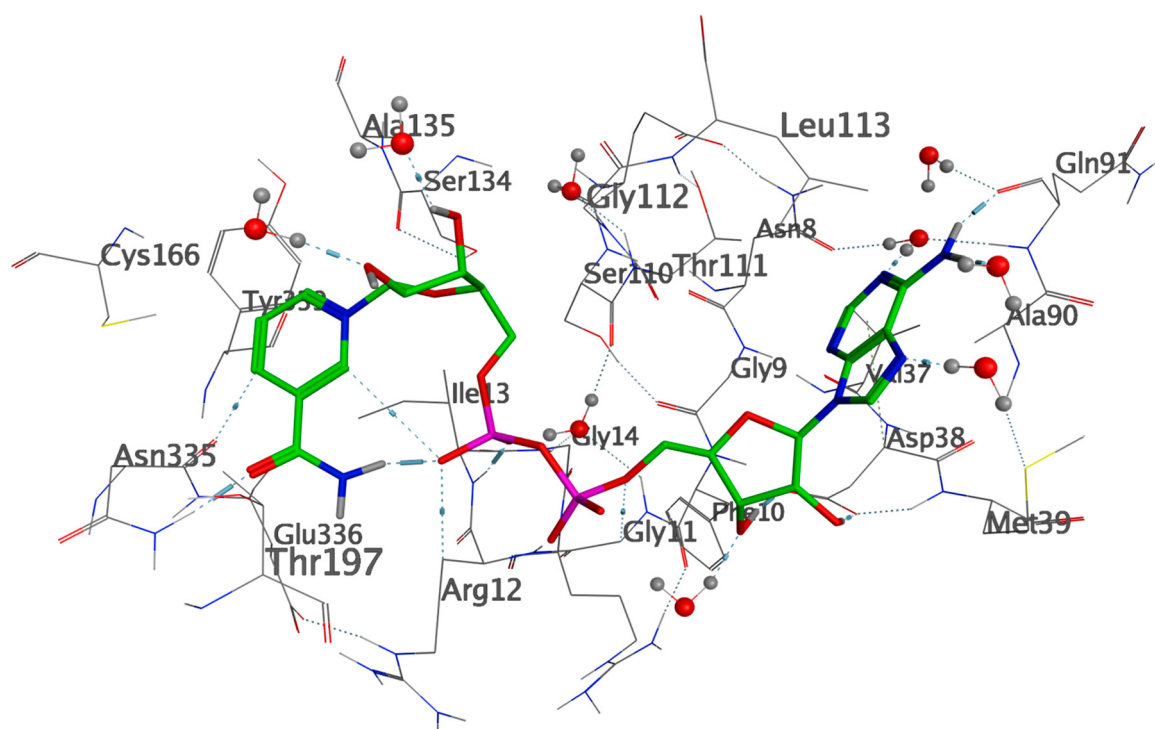

**Figure S6.** Depiction of the NAD<sup>+</sup> site from *TcGAPDH* (PDB-ID 3IDS). Co-crystallized NAD<sup>+</sup> shown with green carbon atoms, non-polar hydrogens not shown.

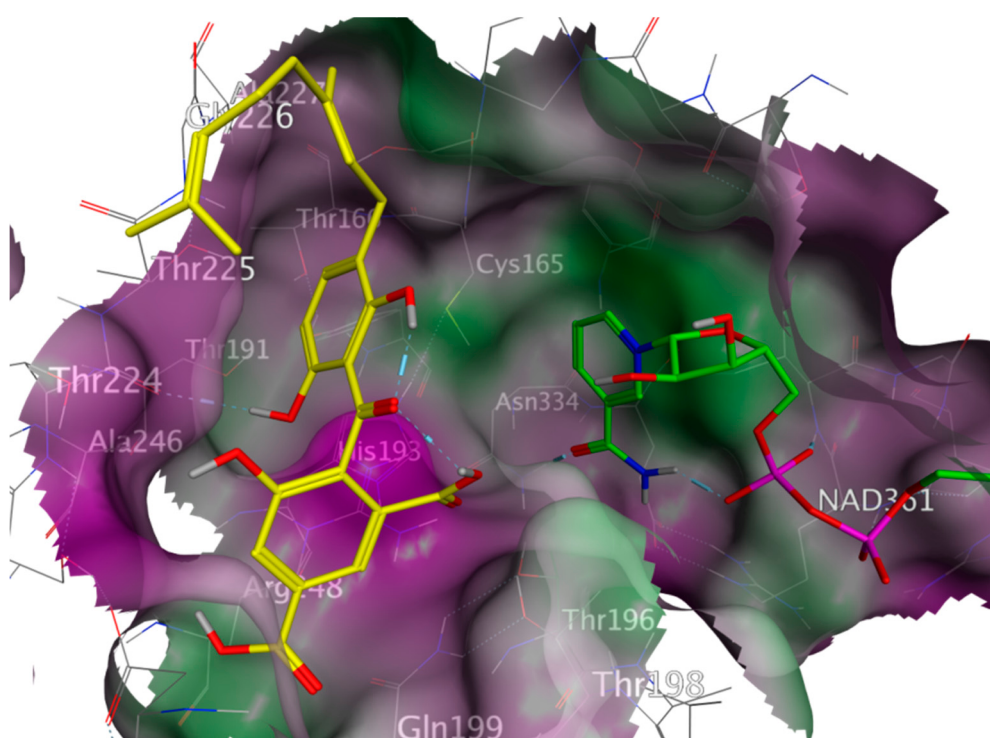

**Figure S7.** Lowest-energy docking pose of compound NP-011694 (**1**) (yellow) in the G-3-P site of *TbGAPDH* (PDB-ID 2X0N), co-crystallized NAD<sup>+</sup> shown with green carbon atoms; rendered surface colored according to lipophilicity, green indicating high, purple low lipophilicity, non-polar hydrogens not shown.

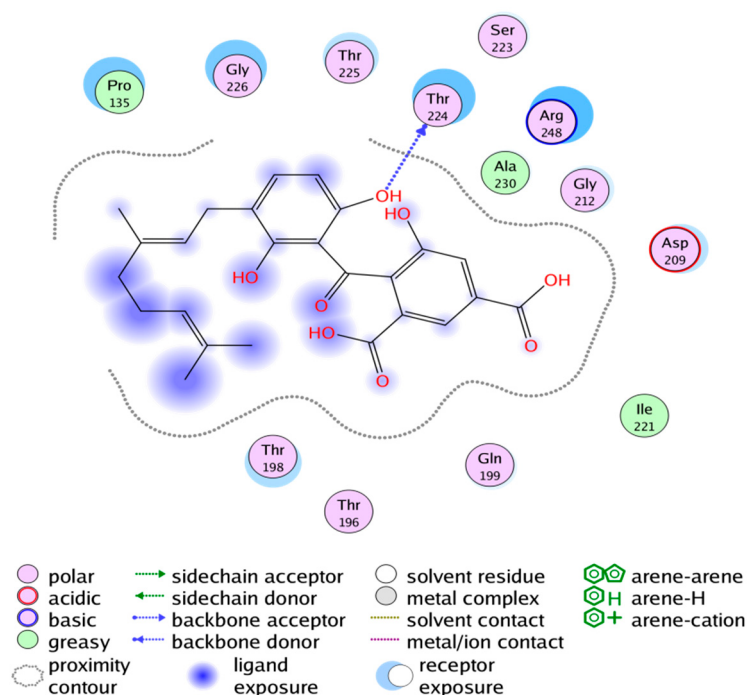

**Figure S8.** Interactions between the lowest-energy docking pose of compound NP-011694 (1) and the G-3-P site of *Tb*GAPDH (PDB-ID 2X0N).

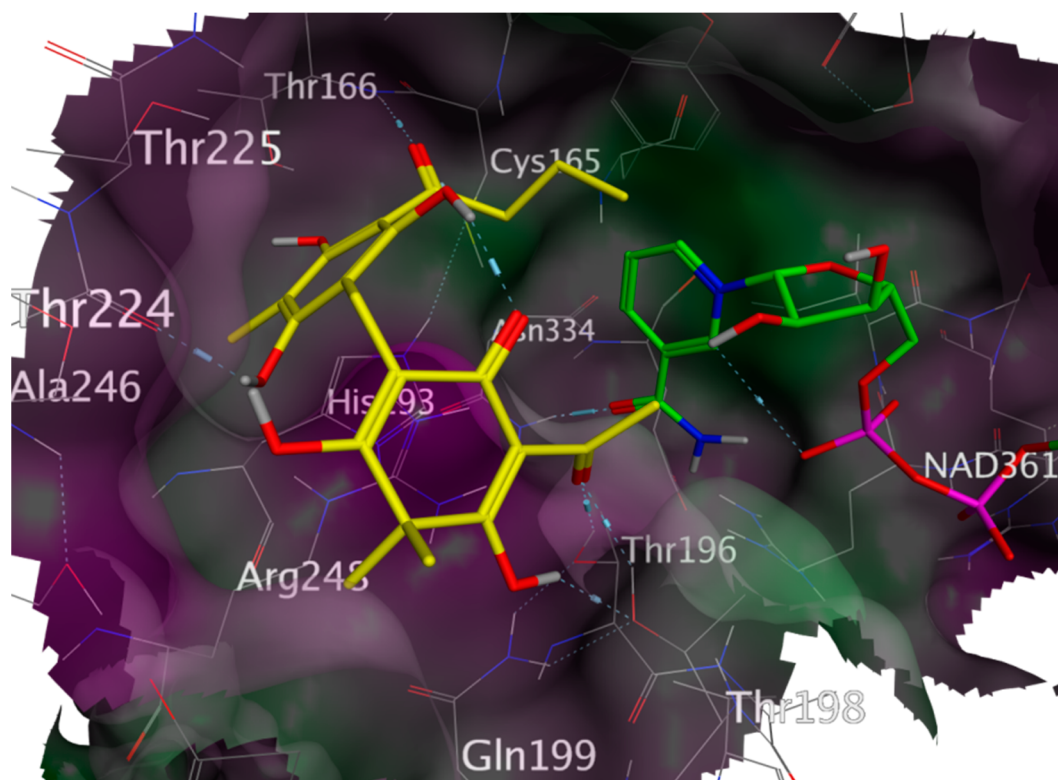

**Figure S9.** Lowest-energy docking pose of compound NP-013330 (3) (yellow) in the G-3-P site of *Tb*GAPDH (PDB-ID 2X0N), co-crystallized NAD<sup>+</sup> shown with green carbon atoms; rendered surface colored according to lipophilicity, green indicating high, purple low lipophilicity, non-polar hydrogens not shown.

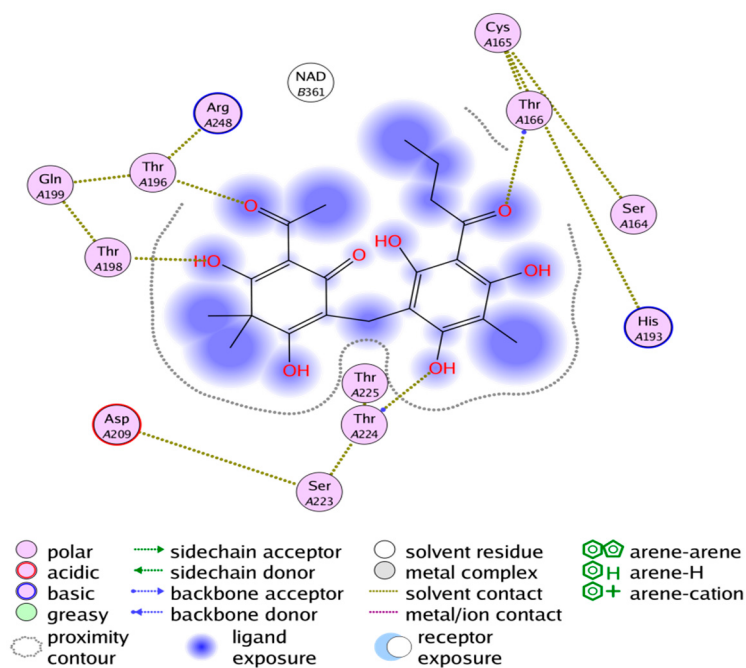

**Figure S10.** Interactions between the lowest-energy docking pose of compound NP-013330 (3) and the G-3-P site of *Tb*GAPDH (PDB-ID 2X0N).

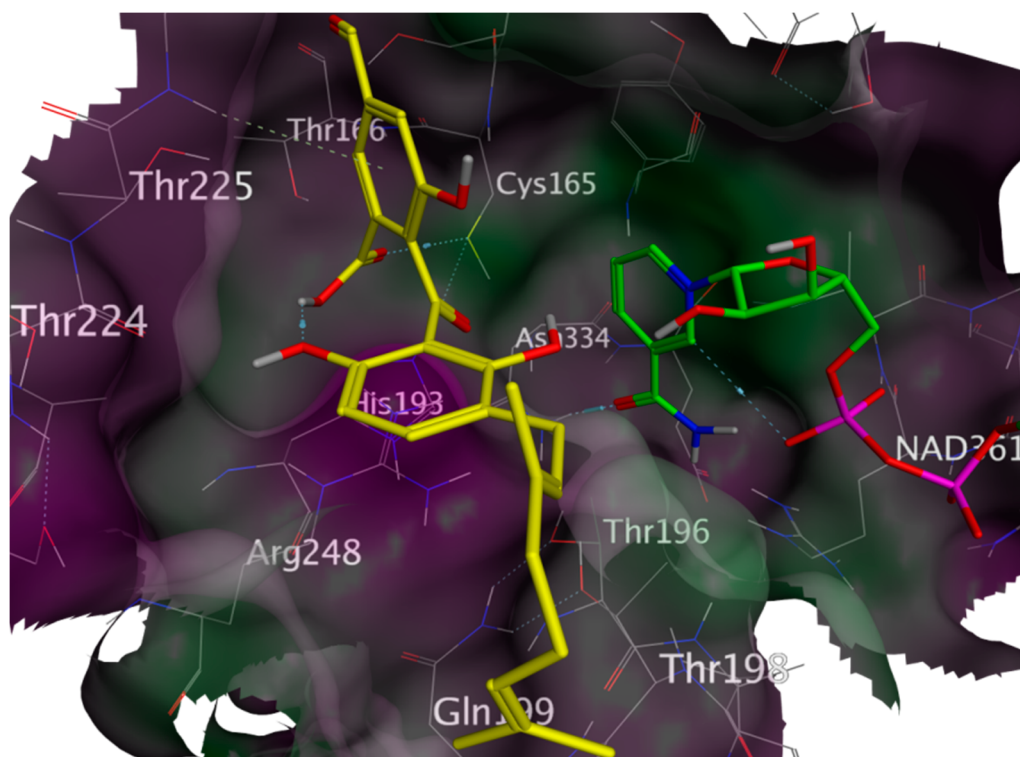

**Figure S11.** Lowest-energy docking pose of compound NP-013378 (4) (yellow) in the G-3-P site of *Tb*GAPDH (PDB-ID 2X0N), co-crystallized NAD<sup>+</sup> shown with green carbon atoms; rendered surface colored according to lipophilicity, green indicating high, purple low lipophilicity, non-polar hydrogens not shown.

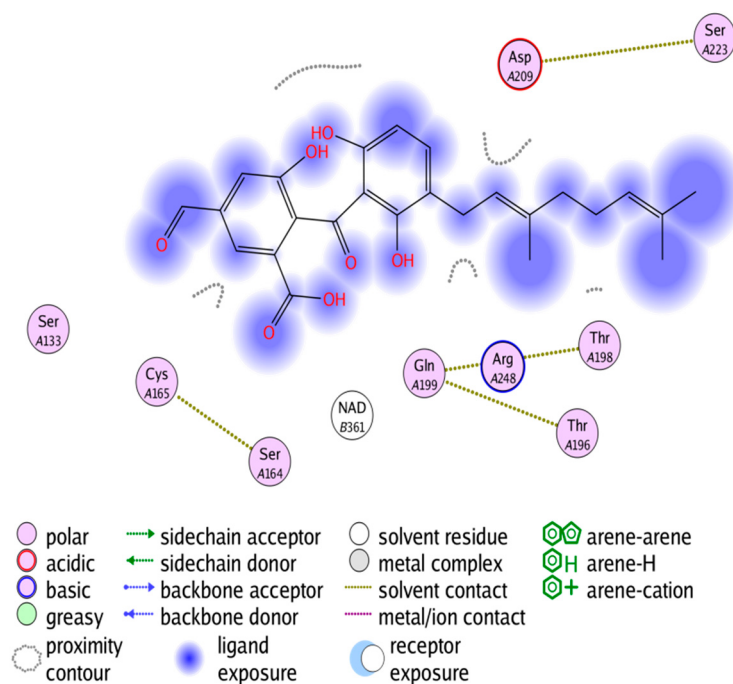

**Figure S12.** Interactions between the lowest-energy docking pose of compound NP-013378 (4) and the G-3-P site of *Tb*GAPDH (PDB-ID 2X0N).

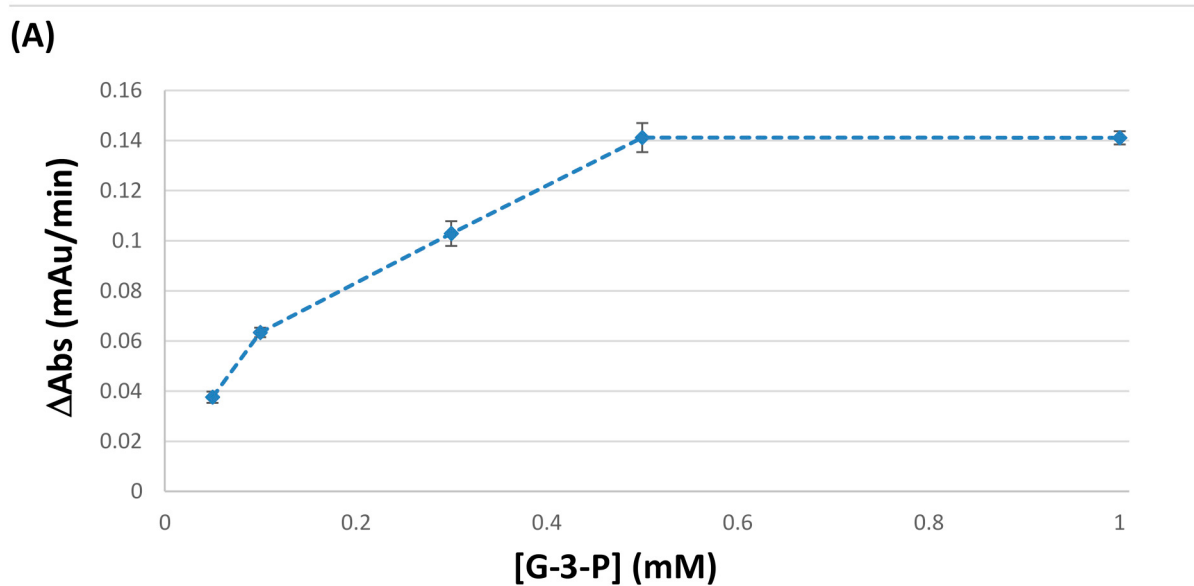

**Figure S13.** *Cont.*

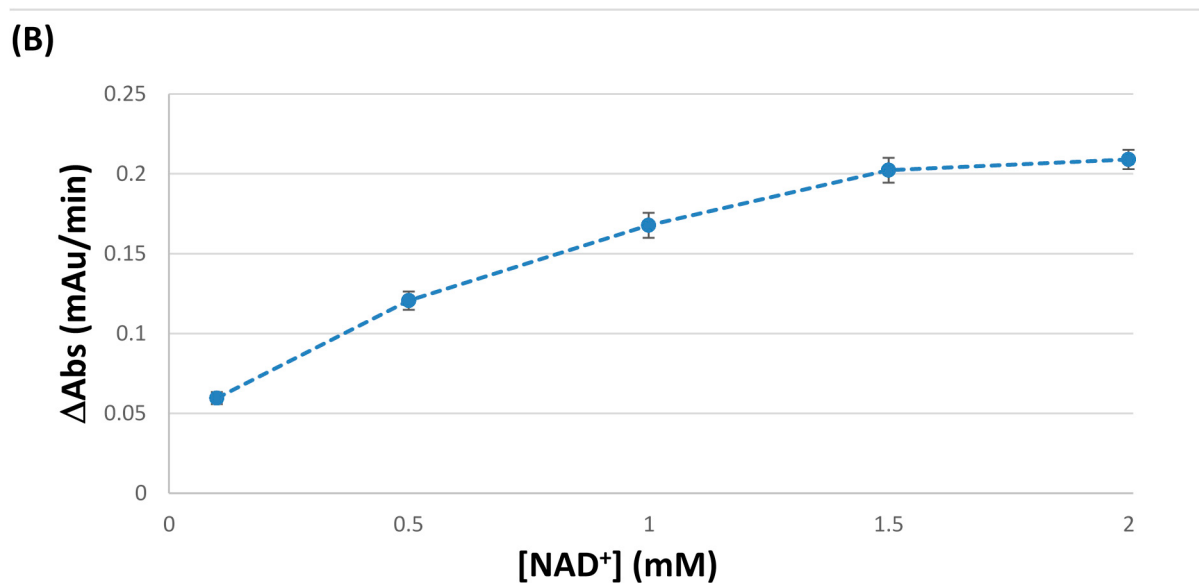

**Figure S13.** Experimental determination of *Tb*GAPDH's saturating conditions of G-3-P and NAD<sup>+</sup>; The extent of enzymatic conversion was monitored by following the increase of absorbance at 340 nm as a linear kinetic parameter. **(A)** Co-Substrate NAD<sup>+</sup> in excess (2 mM) while varying concentrations of G-3-P from 0.1 to 1 mM were used; **(B)** Substrate G-3-P in excess (1 mM) while varying concentrations of NAD<sup>+</sup> from 0.1 to 2 mM were used.

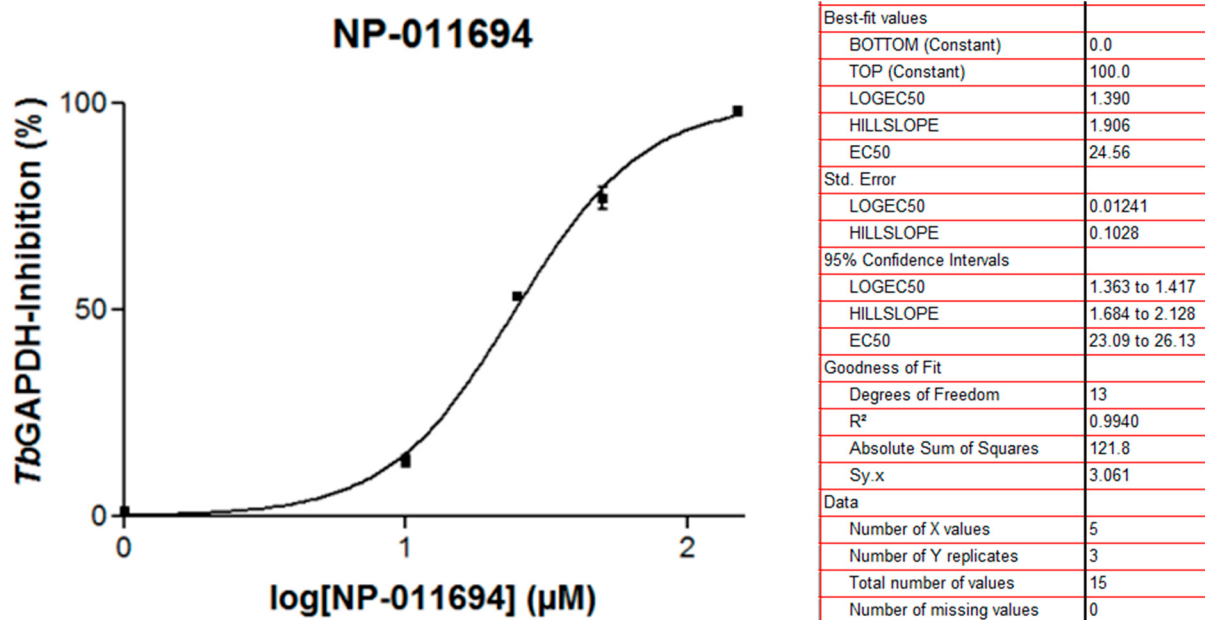

**Figure S-14.** IC<sub>50</sub>-Determination of compound NP-011694 (**1**). The absolute IC<sub>50</sub>-value was determined by nonlinear regression analysis employing GraphPad Prism 3.00 and is given in Table 1.

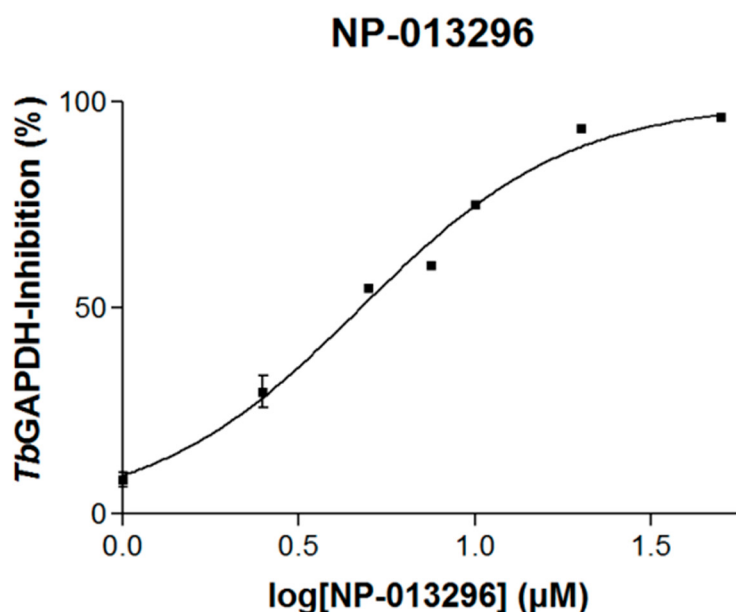

|                          |                  |
|--------------------------|------------------|
| Best-fit values          |                  |
| BOTTOM (Constant)        | 0.0              |
| TOP (Constant)           | 100.0            |
| LOGEC50                  | 0.6752           |
| HILLSLOPE                | 1.460            |
| EC50                     | 4.733            |
| Std. Error               |                  |
| LOGEC50                  | 0.01580          |
| HILLSLOPE                | 0.08073          |
| 95% Confidence Intervals |                  |
| LOGEC50                  | 0.6421 to 0.7082 |
| HILLSLOPE                | 1.291 to 1.629   |
| EC50                     | 4.386 to 5.108   |
| Goodness of Fit          |                  |
| Degrees of Freedom       | 19               |
| R <sup>2</sup>           | 0.9835           |
| Absolute Sum of Squares  | 314.4            |
| Sy.x                     | 4.068            |
| Data                     |                  |
| Number of X values       | 7                |
| Number of Y replicates   | 3                |
| Total number of values   | 21               |
| Number of missing values | 0                |

**Figure S15.** IC<sub>50</sub>-Determination of compound NP-013296 (**2**). The absolute IC<sub>50</sub>-value was determined by nonlinear regression analysis employing GraphPad Prism 3.00 and is given in Table 1.

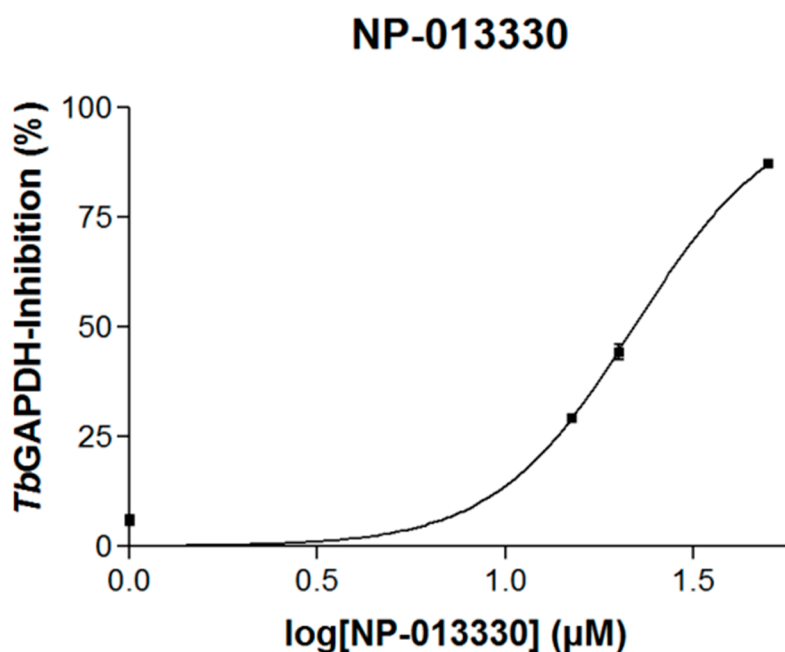

|                          |                |
|--------------------------|----------------|
| Best-fit values          |                |
| BOTTOM (Constant)        | 0.0            |
| TOP (Constant)           | 100.0          |
| LOGEC50                  | 1.342          |
| HILLSLOPE                | 2.324          |
| EC50                     | 21.97          |
| Std. Error               |                |
| LOGEC50                  | 0.01212        |
| HILLSLOPE                | 0.1790         |
| 95% Confidence Intervals |                |
| LOGEC50                  | 1.315 to 1.369 |
| HILLSLOPE                | 1.925 to 2.723 |
| EC50                     | 20.64 to 23.38 |
| Goodness of Fit          |                |
| Degrees of Freedom       | 10             |
| R <sup>2</sup>           | 0.9872         |
| Absolute Sum of Squares  | 135.7          |
| Sy.x                     | 3.683          |
| Data                     |                |
| Number of X values       | 4              |
| Number of Y replicates   | 3              |
| Total number of values   | 12             |
| Number of missing values | 0              |

**Figure S16.** IC<sub>50</sub>-Determination of compound NP-013330 (**3**). The absolute IC<sub>50</sub>-value was determined by nonlinear regression analysis employing GraphPad Prism 3.00 and is given in Table 1.

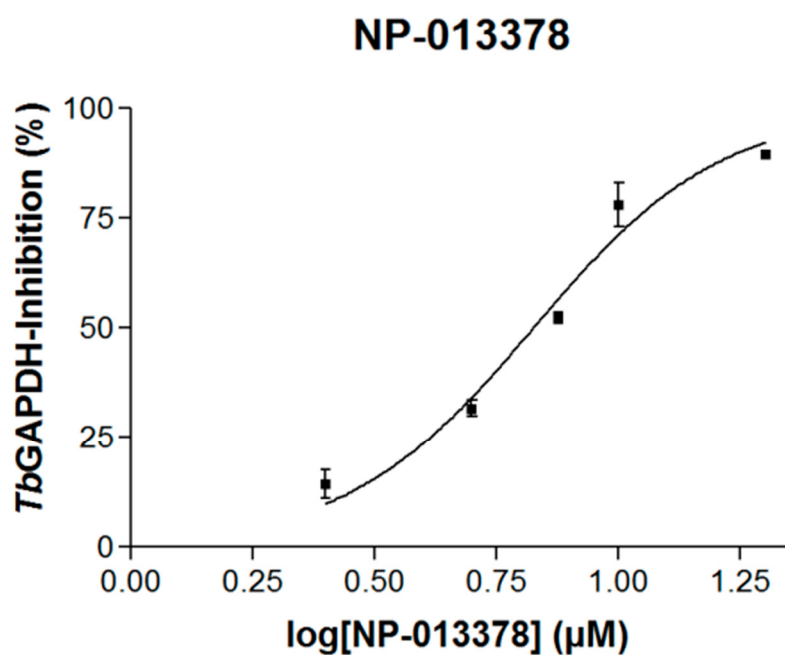

|                          |                  |
|--------------------------|------------------|
| Best-fit values          |                  |
| BOTTOM (Constant)        | 0.0              |
| TOP (Constant)           | 100.0            |
| LOGEC50                  | 0.8249           |
| HILLSLOPE                | 2.259            |
| EC50                     | 6.683            |
| Std. Error               |                  |
| LOGEC50                  | 0.01753          |
| HILLSLOPE                | 0.2323           |
| 95% Confidence Intervals |                  |
| LOGEC50                  | 0.7871 to 0.8628 |
| HILLSLOPE                | 1.758 to 2.761   |
| EC50                     | 6.125 to 7.292   |
| Goodness of Fit          |                  |
| Degrees of Freedom       | 13               |
| R <sup>2</sup>           | 0.9557           |
| Absolute Sum of Squares  | 531.4            |
| Sy.x                     | 6.394            |
| Data                     |                  |
| Number of X values       | 5                |
| Number of Y replicates   | 3                |
| Total number of values   | 15               |
| Number of missing values | 0                |

**Figure S17.** IC<sub>50</sub>-Determination of compound NP-013378 (**4**). The absolute IC<sub>50</sub>-value was determined by nonlinear regression analysis employing GraphPad Prism 3.00 and is given in Table 1.

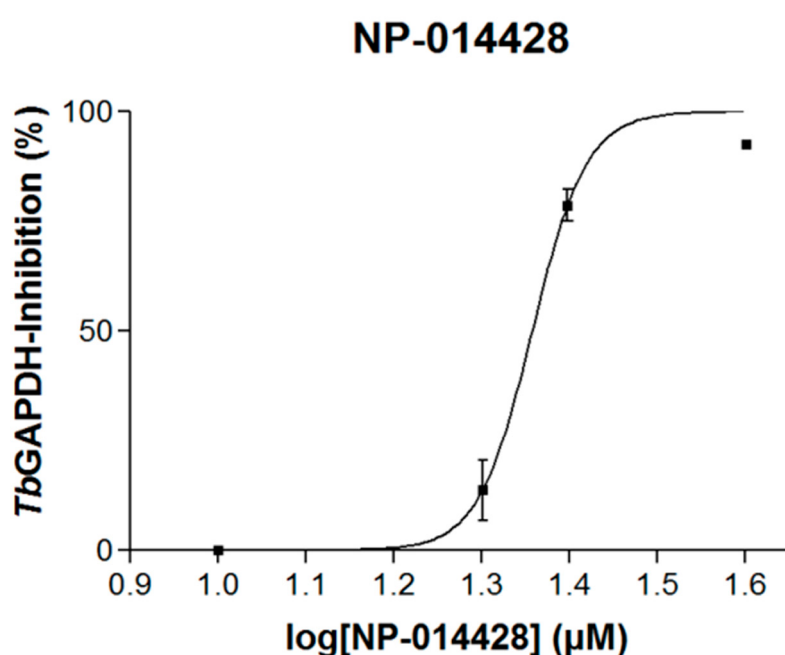

|                          |                |
|--------------------------|----------------|
| Best-fit values          |                |
| BOTTOM (Constant)        | 0.0            |
| TOP (Constant)           | 100.0          |
| LOGEC50                  | 1.358          |
| HILLSLOPE                | 14.08          |
| EC50                     | 22.79          |
| Std. Error               |                |
| LOGEC50                  | 0.006392       |
| HILLSLOPE                | 1.942          |
| 95% Confidence Intervals |                |
| LOGEC50                  | 1.344 to 1.372 |
| HILLSLOPE                | 9.750 to 18.40 |
| EC50                     | 22.06 to 23.55 |
| Goodness of Fit          |                |
| Degrees of Freedom       | 10             |
| R <sup>2</sup>           | 0.9731         |
| Absolute Sum of Squares  | 527.8          |
| Sy.x                     | 7.265          |
| Data                     |                |
| Number of X values       | 4              |
| Number of Y replicates   | 3              |
| Total number of values   | 12             |
| Number of missing values | 0              |

**Figure S18.** IC<sub>50</sub>-Determination of compound NP-014428 (**5**). The absolute IC<sub>50</sub>-value was determined by nonlinear regression analysis employing GraphPad Prism 3.00 and is given in Table 1.
